# Supplementary material for: Preparative separation of structural isomeric pentacyclic triterpene oleanolic acid and ursolic acid from natural products by pH-zone-refining countercurrent chromatography
Source: Royal Society of Chemistry journal article supplement (doi:10.1039/c9ra06082k), 2019-01-01
Supplement: c9ra06082k1.pdf [file c9ra06082k1.pdf]

Supplementary material

**Preparative separation of structural isomeric pentacyclic triterpene oleanolic acid and ursolic acid from natural products by pH-zone-refining countercurrent chromatography**

Chaoyue Wang, Xiang Wang, Shanshan Zhao, Wenyu Sun and Shengqiang Tong\*

*College of Pharmaceutical Science, Zhejiang University of Technology, Hangzhou, 310032, China*

The telephone/fax number, email and postal address of the corresponding author:

Prof. Shengqiang Tong

Tel.: +86 571 88320984; fax: +86 571 88320984

E-mail: [sqtong@zjut.edu.cn](mailto:sqtong@zjut.edu.cn)

Postal address: College of Pharmaceutical Science, Zhejiang University of Technology,

Chaowang Road 18, Chaohui No. 6 District, Hangzhou, CHINA°C

Table 1 Partition coefficient of oleanolic acid and ursolic acid in the investigated two-phase solvent systems for pH-refining-zone countercurrent chromatography

| Solvent systems                                       |                         | Partition coefficient ( <i>K</i> ) |         |         |
|-------------------------------------------------------|-------------------------|------------------------------------|---------|---------|
|                                                       |                         |                                    | OA      | UA      |
| <i>n</i> -hexane:ethyl acetate:methanol:water         | 5:5:2:8                 | <i>K<sub>base</sub></i>            | 4.964   | 4.853   |
|                                                       |                         | <i>K<sub>acid</sub></i>            | 168.484 | 146.25  |
|                                                       | 6:4:2:8                 | <i>K<sub>base</sub></i>            | 3.036   | 3.357   |
|                                                       |                         | <i>K<sub>acid</sub></i>            | 28.824  | 267.457 |
|                                                       | 10:0:2:8                | <i>K<sub>base</sub></i>            | 0.593   | 0.913   |
|                                                       |                         | <i>K<sub>acid</sub></i>            | 126.384 | 179.171 |
|                                                       | 7:3:3:7                 | <i>K<sub>base</sub></i>            | 1.540   | 1.530   |
|                                                       |                         | <i>K<sub>acid</sub></i>            | 159.302 | 165.035 |
|                                                       | 9:1:3:7                 | <i>K<sub>base</sub></i>            | 0.380   | 0.324   |
|                                                       |                         | <i>K<sub>acid</sub></i>            | 139.021 | 147.409 |
|                                                       | 10:0:3:7                | <i>K<sub>base</sub></i>            | 0.127   | 0.187   |
|                                                       |                         | <i>K<sub>acid</sub></i>            | 100.778 | 120.866 |
|                                                       | 4:6:4:6                 | <i>K<sub>base</sub></i>            | 0.415   | 0.403   |
|                                                       |                         | <i>K<sub>acid</sub></i>            | 76.750  | 75.420  |
|                                                       | 5:5:4:6                 | <i>K<sub>base</sub></i>            | 0.407   | 0.479   |
|                                                       |                         | <i>K<sub>acid</sub></i>            | 73.495  | 74.978  |
| 6:4:4:6                                               | <i>K<sub>base</sub></i> | 0.3101                             | 0.324   |         |
|                                                       | <i>K<sub>acid</sub></i> | 76.514                             | 82.086  |         |
| 7:3:4:6                                               | <i>K<sub>base</sub></i> | 0.276                              | 0.303   |         |
|                                                       | <i>K<sub>acid</sub></i> | 66.477                             | 84.286  |         |
| 1:0:1                                                 | <i>K<sub>base</sub></i> | 2.96                               | 3.301   |         |
|                                                       | <i>K<sub>acid</sub></i> | 125.046                            | 182.047 |         |
| 4:1:5                                                 | <i>K<sub>base</sub></i> | 2.125                              | 2.167   |         |
|                                                       | <i>K<sub>acid</sub></i> | 242.701                            | 129.449 |         |
| methyl <i>tert</i> -butyl ether-tetrahydrofuran-water | 2:2:3                   | <i>K<sub>base</sub></i>            | 0.369   | 0.3214  |
|                                                       |                         | <i>K<sub>acid</sub></i>            | 114.656 | 174.573 |
| 6:3:8                                                 | <i>K<sub>base</sub></i> | 2.577                              | 2.461   |         |
|                                                       | <i>K<sub>acid</sub></i> | 34.545                             | 55.271  |         |
| 4:1:5                                                 | <i>K<sub>base</sub></i> | 0.422                              | 0.395   |         |
|                                                       | <i>K<sub>acid</sub></i> | 225.88                             | 312.046 |         |
| methyl <i>tert</i> -butyl ether-acetonitrile-water    | 2:2:3                   | <i>K<sub>base</sub></i>            | 0.844   | 0.7398  |
|                                                       |                         | <i>K<sub>acid</sub></i>            | 34.067  | 31.839  |
| 6:3:8                                                 | <i>K<sub>base</sub></i> | 0.3387                             | 0.3045  |         |
|                                                       | <i>K<sub>acid</sub></i> | 16.9217                            | 26.8043 |         |
| 4:3:2                                                 | <i>K<sub>base</sub></i> | 0.2599                             | 0.282   |         |
|                                                       | <i>K<sub>acid</sub></i> | 141.94                             | 146.25  |         |
| chloroform-methanol-water                             | 4:3.5:2                 | <i>K<sub>base</sub></i>            | 0.175   | 0.183   |
|                                                       |                         | <i>K<sub>acid</sub></i>            | 101.381 | 72.303  |

|                                                         |           |            |         |         |
|---------------------------------------------------------|-----------|------------|---------|---------|
|                                                         | 13:7:4    | $K_{base}$ | 0.361   | 0.359   |
|                                                         |           | $K_{acid}$ | 129.465 | 109.561 |
|                                                         | 10:8:4    | $K_{base}$ | 0.4393  | 0.4613  |
|                                                         |           | $K_{acid}$ | 29.923  | 28.4028 |
|                                                         | 2:2:1     | $K_{base}$ | 0.107   | 0.113   |
|                                                         |           | $K_{acid}$ | 41.031  | 51.573  |
| chloroform-methanol- <i>n</i> -<br>butanol-water        | 4:3:0.5:2 | $K_{base}$ | 1.72    | 1.624   |
|                                                         |           | $K_{acid}$ | 30.301  | 31.296  |
| <i>n</i> -hexane-<br>dichloromethane-<br>methanol-water | 7:3:4:6   | $K_{base}$ | 0.035   | 0.04    |
|                                                         |           | $K_{acid}$ | 7.637   | 6.725   |
|                                                         | 7:3:3:7   | $K_{base}$ | 0.0669  | 0.06716 |
|                                                         |           | $K_{acid}$ | 19.803  | 18.5536 |
|                                                         | 7:3:2:8   | $K_{base}$ | 0.0726  | 0.0938  |
|                                                         |           | $K_{acid}$ | 35.4918 | 47.841  |
|                                                         | 6:4:2:8   | $K_{base}$ | 0.1536  | 0.1703  |
|                                                         |           | $K_{acid}$ | 40.375  | 41.5388 |

Note:  $K_{acid}$  was determined with the biphasic solvent system added with 10 mmol/L of trifluoroacetic acid in the organic phase, and  $K_{base}$  was determined with the biphasic solvent system added with 10 mmol/L of ammonia (with 25%-28% NH<sub>3</sub>) in the aqueous phase.

Table 2 Partition coefficient of oleanolic acid and ursolic acid in the investigated two-phase solvent systems for conventional countercurrent chromatography

| Solvent systems                                                                  | $K_{OA}$ | $K_{UA}$ | $\alpha$ |
|----------------------------------------------------------------------------------|----------|----------|----------|
| <i>n</i> -hexane-dichloromethane-methanol-1%<br>acetic acid water(v/v, 9:1:6:4)  | 3.782    | 4.174    | 1.103    |
| <i>n</i> -hexane-dichloromethane-methanol-1%<br>acetic acid water (v/v, 9:1:7:3) | 1.560    | 1.644    | 1.054    |
| <i>n</i> -hexane-dichloromethane-methanol-1%<br>acetic acid water (v/v, 7:3:7:3) | 2.698    | 2.007    | 1.215    |
| <i>n</i> -hexane-dichloromethane-methanol-1%<br>acetic acid water (v/v, 8:2:7:3) | 2.164    | 2.007    | 1.078    |
| <i>n</i> -hexane-dichloromethane-methanol-1%<br>acetic acid water(v/v, 7:3:8:2)  | 0.830    | 0.727    | 1.133    |
| <i>n</i> -hexane-ethyl acetate-methanol-1% acetic<br>acid water(v/v, 7:3:6:4)    | 1.812    | 1.933    | 1.067    |
| <i>n</i> -hexane-ethyl acetate-methanol-1% acetic<br>acid water(v/v, 7:3:5:5)    | 2.066    | 2.233    | 1.081    |
| <i>n</i> -hexane-ethyl acetate-methanol-1% acetic<br>acid water(v/v, 7:3:4:6)    | 2.509    | 2.775    | 1.106    |
